# Supplementary material for: AIE-based donor–acceptor–donor fluorenone compound as multi-functional luminescence materials
Source: Royal Society of Chemistry journal article supplement (doi:10.1039/d1qm00856k), 2021-01-01
Supplement: d1qm00856k1.pdf [file d1qm00856k1.pdf]

**Electronic Supplementary Information**

**AIE-based Donor-Acceptor-Donor Fluorenone  
Compound as multi-functional luminescence  
materials**

Xianchao Du<sup>a,b,d‡</sup>, Huifang Su<sup>c‡</sup>, Li Zhao<sup>b‡</sup>, Xiaojing Xing<sup>a</sup>, Bingnan Wang<sup>d</sup>, Dongfang Qiu<sup>\*a</sup>, Jinyi

Wang<sup>\*b</sup> and Mao-Sen Yuan<sup>\*b</sup>

<sup>a</sup> College of Chemistry and Pharmaceutical Engineering, Nanyang Normal University, Nanyang, Henan 473061, P. R. China

<sup>b</sup> College of Chemistry & Pharmacy, Northwest A&F University, Yangling, Shanxi 712100, P. R. China

<sup>c</sup> Department of Orthopaedic Surgery, The First Affiliated Hospital of Zhengzhou University, Zhengzhou, Henan 450052, P. R. China.

<sup>d</sup> State Key Laboratory of Luminescent Materials and Devices, Guangdong Provincial Key Laboratory of Luminescence from Molecular Aggregates, Center for Aggregation-Induced Emission, South China University of Technology, Guangzhou, Guangdong 510640, P. R. China.

## Synthesis of MBPF

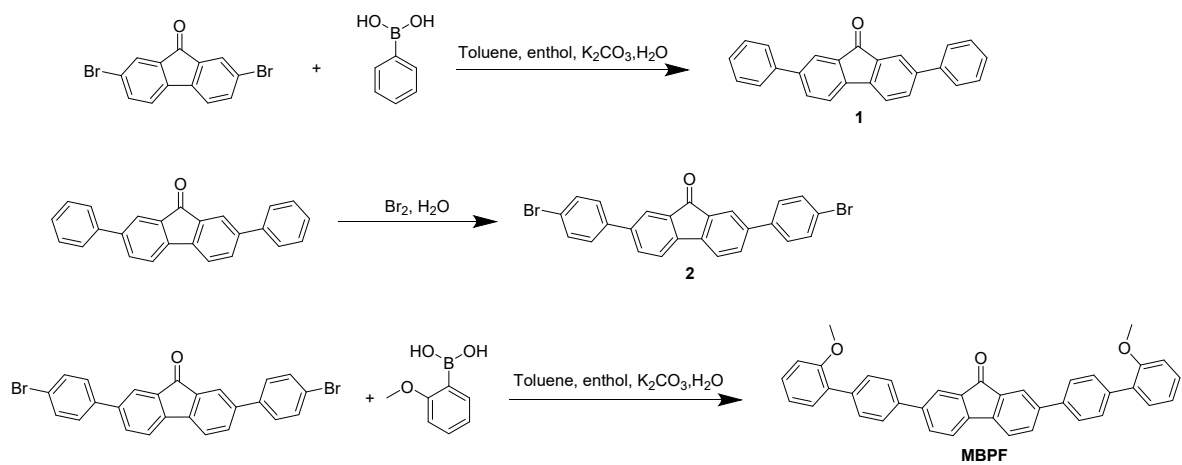

Scheme S1. Synthetic routes to MBPF.

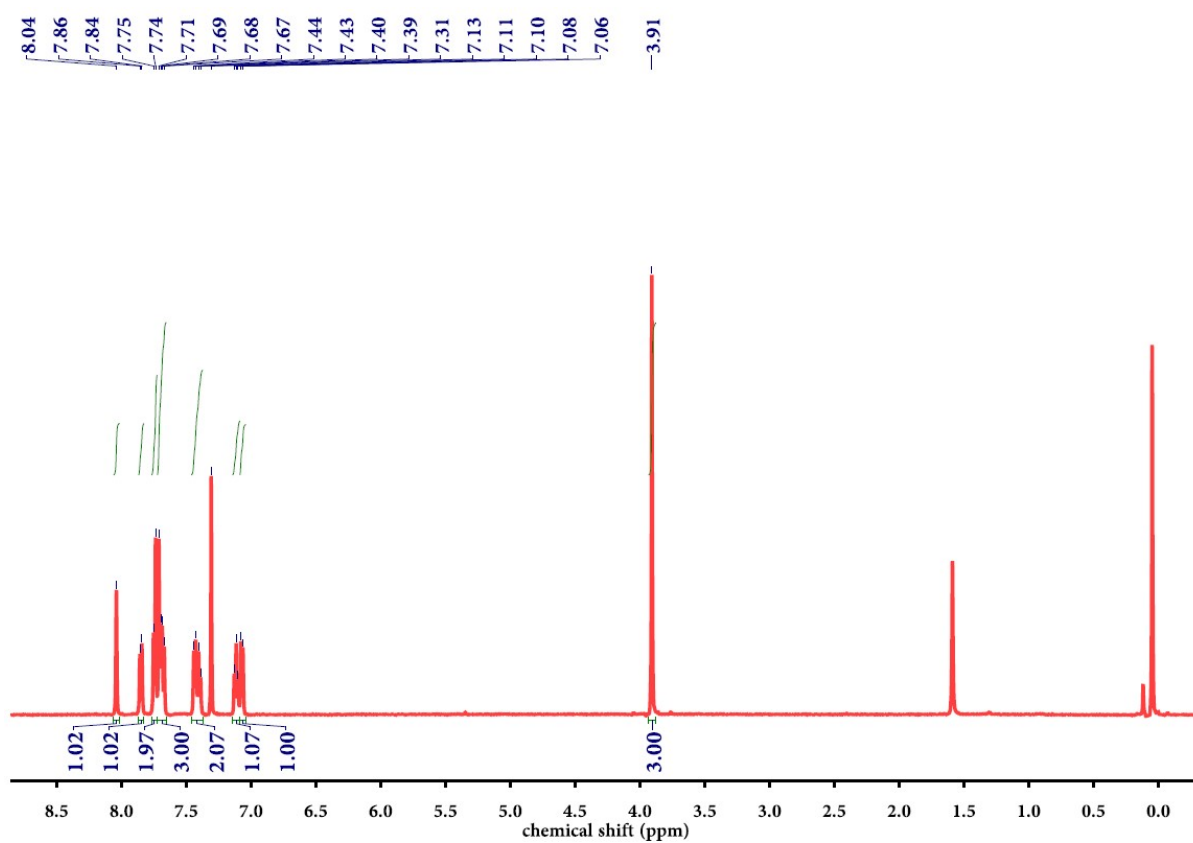

Fig. S1  $^1\text{H}$  NMR spectrum (500 MHz,  $\text{CDCl}_3$ ) of compound MBPF.

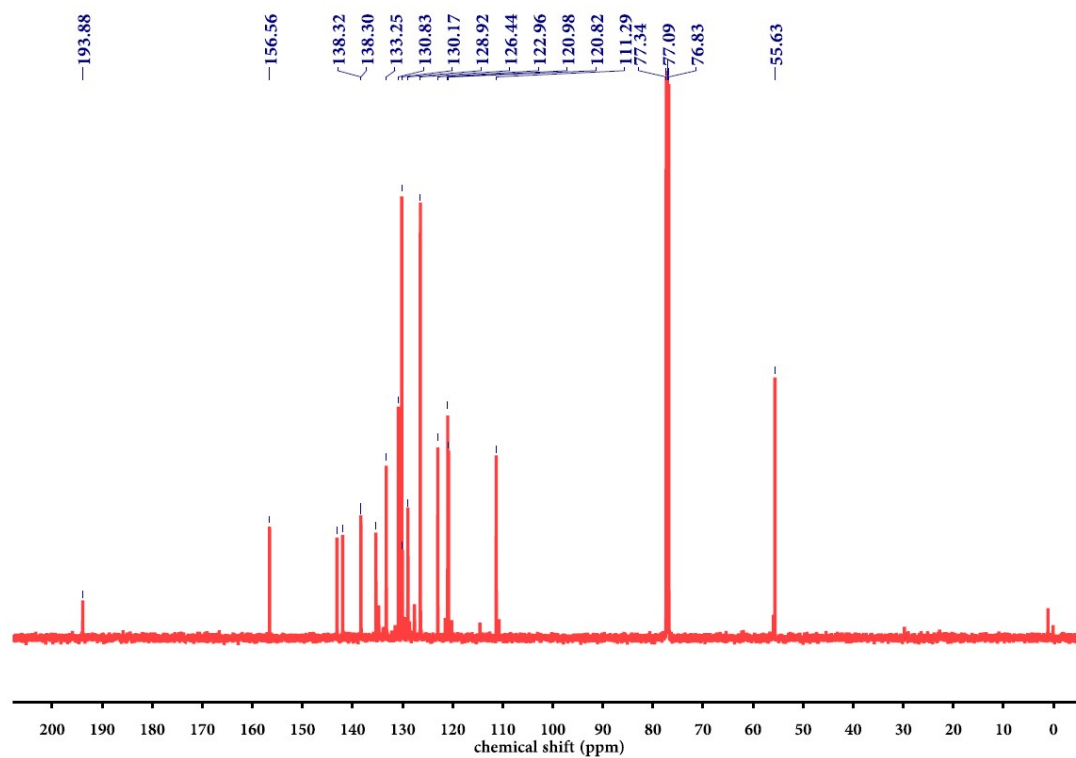

**Fig. S2**  $^{13}\text{C}$  NMR spectrum (126 MHz,  $\text{CDCl}_3$ ) of compound **MBPF**.

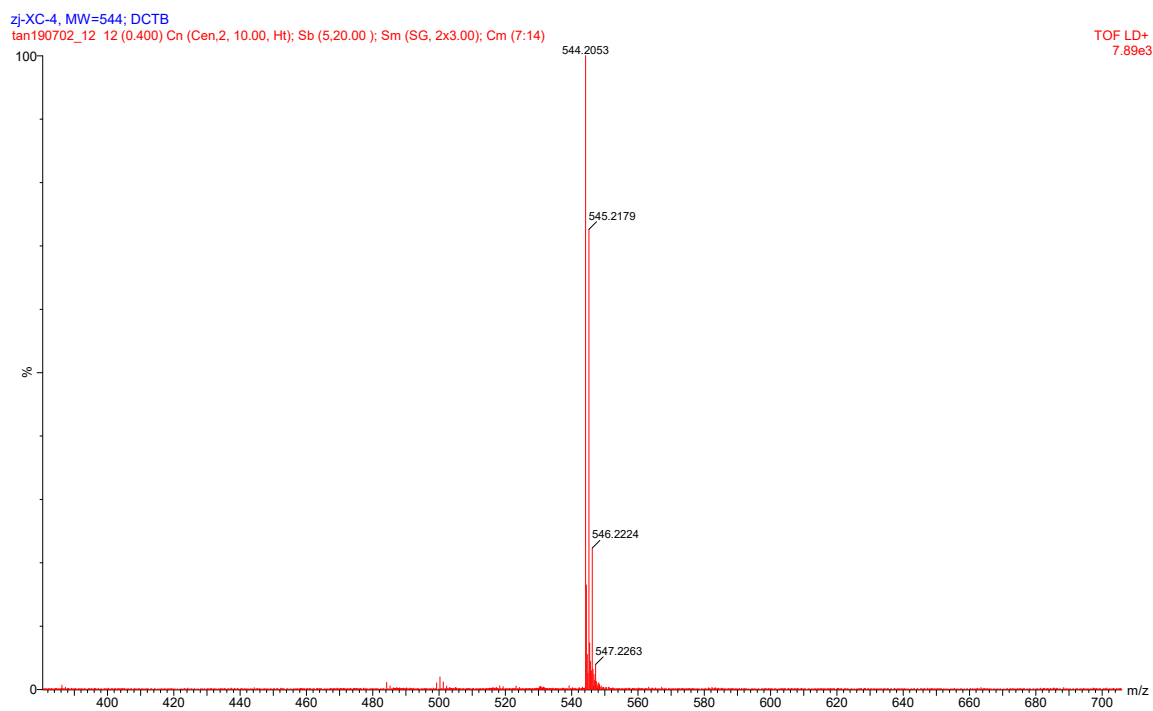

**Fig. S3** HRMS spectrum of **MBPF**.

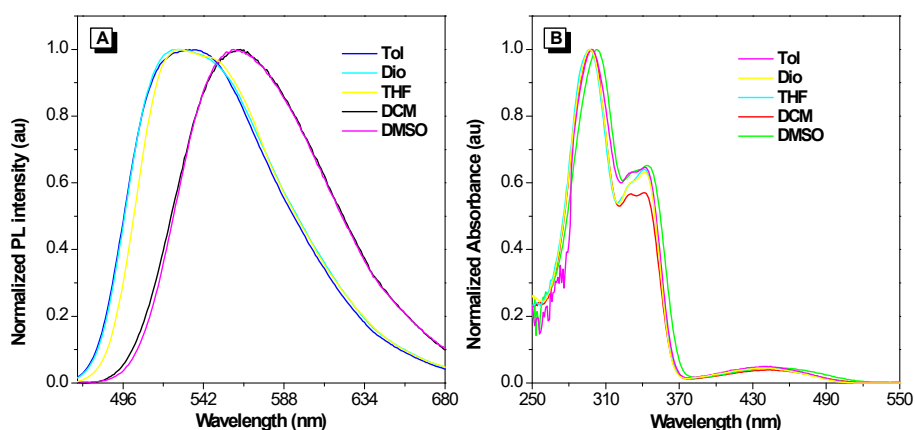

**Fig. S4** Normalized PL spectra (A) and absorbance spectra (B) of **MBPF** in different solvents. Tol, toluene; Dio, dioxane; THF, tetrahydrofuran; DCM, dichloromethane; DMSO, dimethylsulfoxide.

**Table S1.** Photophysical properties of **MBPF** in various solvents

| Solvent <sup>a</sup> | $\lambda_{\text{abs}}^{\text{b}}$ | $\lambda_{\text{em}}^{\text{c}}$ | $\Phi(\%)^{\text{d}}$ | $\tau^{\text{e}}$ |
|----------------------|-----------------------------------|----------------------------------|-----------------------|-------------------|
| <b>Tol</b>           | 297                               | 530                              | 0.25                  | 6.19              |
| <b>Dio</b>           | 297                               | 527                              | 0.15                  | 9.26              |
| <b>THF</b>           | 298                               | 529                              | 0.16                  | 9.86              |
| <b>DCM</b>           | 299                               | 559                              | 0.07                  | 2.91              |
| <b>DMSO</b>          | 303                               | 563                              | 0.07                  | 3.01              |

<sup>a</sup> Abbreviations: Tol, Toluene; Dio, Dioxane; THF, Tetrahydrofuran; DCM, Dichloromethane; DMSO, Dimethyl sulfoxide; <sup>b</sup>  $\lambda_{\text{abs}}$ , absorption maximum, <sup>c</sup>  $\lambda_{\text{ex}}$ , emission maximum, <sup>d</sup> Fluorescence quantum yield, <sup>e</sup> Fluorescence lifetime.

**Table S2.** Spectroscopic data for compound **MBPF**

|                            | Solution in THF <sup>a</sup> |                            |          |               | Crystalline powder         |        |             |
|----------------------------|------------------------------|----------------------------|----------|---------------|----------------------------|--------|-------------|
|                            | $\lambda_{\text{abs}}$ (nm)  | $\lambda_{\text{em}}$ (nm) | $\Phi^c$ | $\tau^d$ (ns) | $\lambda_{\text{em}}$ (nm) | $\Phi$ | $\tau$ (ns) |
| <b>Y-MBPF</b> <sup>b</sup> |                              |                            |          |               | 532                        | 0.43   | 11.41       |
| <b>O-MBPF</b>              | 298, 340                     | 530                        | 0.16     | 9.86          | 558                        | 0.35   | 9.05        |
| <b>R-MBPF</b>              |                              |                            |          |               | 590                        | 0.36   | 9.55        |

<sup>a</sup> With  $c = 1.0 \times 10^{-5} \text{ mol L}^{-1}$ . <sup>b</sup> The amorphous, red crystal and orange crystal of compound **MBPF** are named **Y-MBPF**, **O-MBPF** and **R-MBPF**, respectively. <sup>c</sup> Fluorescence quantum yield. <sup>d</sup> Fluorescence lifetime.

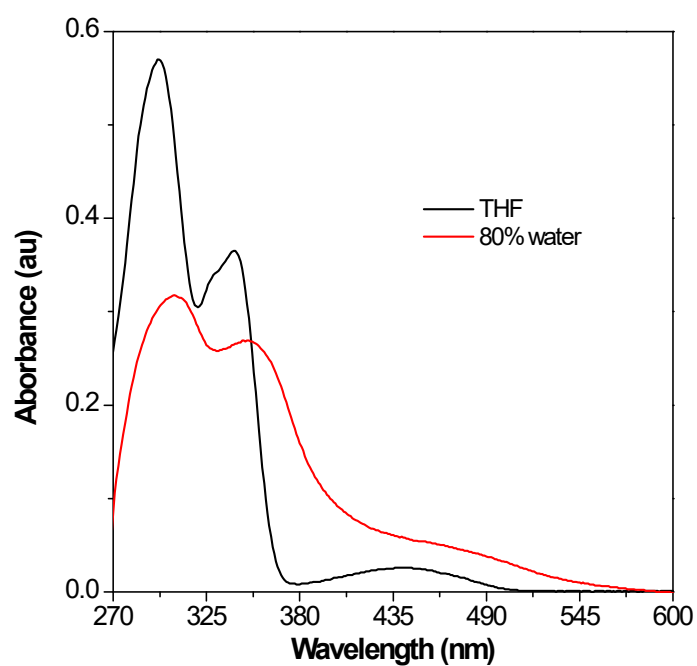**Fig. S5** The absorbance spectra of **MBPF** in pure THF and 80% water/THF.

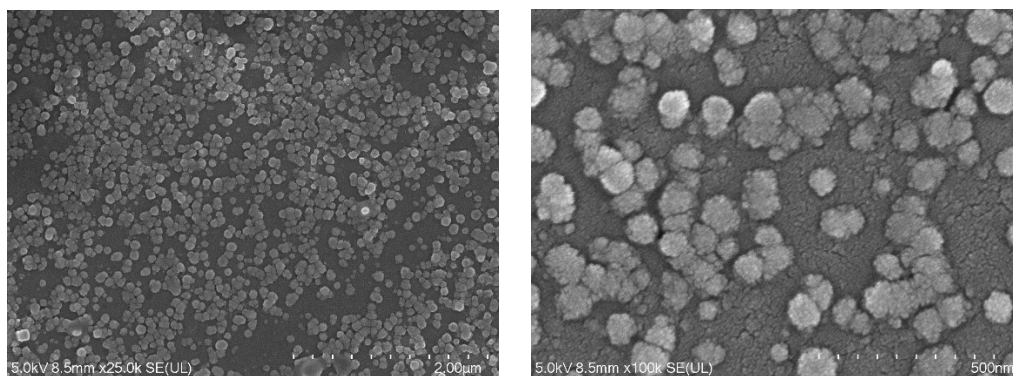

**Fig. S6** The SEM of **MBPF** in water/THF (90 vol% water).

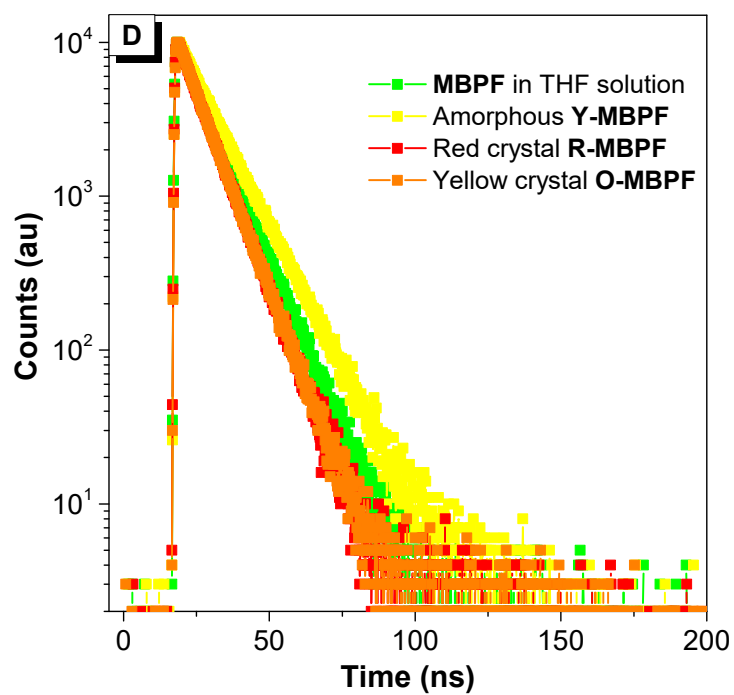

**Fig. S7** The fluorescence decay profiles of **MBPF** in THF, Orange crystal **O-MBPF**, Red crystal **R-MBPF** and amorphous **Y-MBPF**.

**Table S3. Selected crystallographic data for O-MBPF and R-MBPF.**

| crystals                                          | O-MBPF                                         | R-MBPF                                         |
|---------------------------------------------------|------------------------------------------------|------------------------------------------------|
| formula                                           | C <sub>39</sub> H <sub>28</sub> O <sub>3</sub> | C <sub>39</sub> H <sub>28</sub> O <sub>3</sub> |
| fw[g·mol <sup>-1</sup> ]                          | 544.61                                         | 544.61                                         |
| crystal color                                     | Orange                                         | Red                                            |
| crystal system                                    | Monoclinic                                     | Triclinic                                      |
| space group                                       | <i>P2<sub>1</sub>/c</i>                        | <i>P-1</i>                                     |
| <i>a</i> [Å]                                      | 10.028(11)                                     | 10.0977(9)                                     |
| <i>b</i> [Å]                                      | 17.169(19)                                     | 13.5881(12)                                    |
| <i>c</i> [Å]                                      | 32.96(4)                                       | 22.1586(19)                                    |
| $\beta$ [°]                                       | 94.169(19)                                     | 78.4920(10)                                    |
| <i>V</i> [Å <sup>3</sup> ]                        | 5660(11)                                       | 2853.9(4)                                      |
| <i>Z</i>                                          | 8                                              | 4                                              |
| $\rho_{\text{calcd}}$ [g/cm <sup>3</sup> ]        | 1.278                                          | 1.268                                          |
| $\mu$ [mm <sup>-1</sup> ]                         | 0.080                                          | 0.079                                          |
| <i>T</i> [K]                                      | 298(2)                                         | 298(2)                                         |
| $\theta_{\text{min}}-\theta_{\text{max}}$ [°]     | 2.20-25.02                                     | 2.29 –25.02                                    |
| <i>R/wR</i> [ <i>I</i> > 2 $\sigma$ ( <i>I</i> )] | 0.1058/0.1393                                  | 0.0507/0.0607                                  |

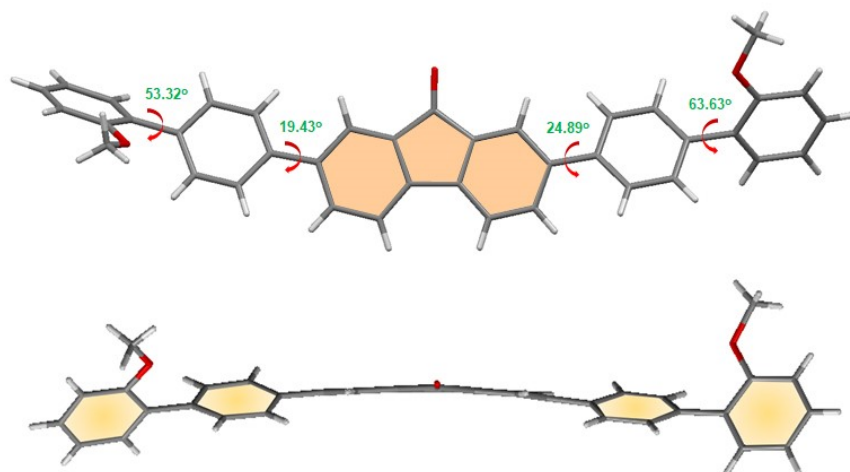

**Fig. S8** The single crystal structure of **O-MBPF**.

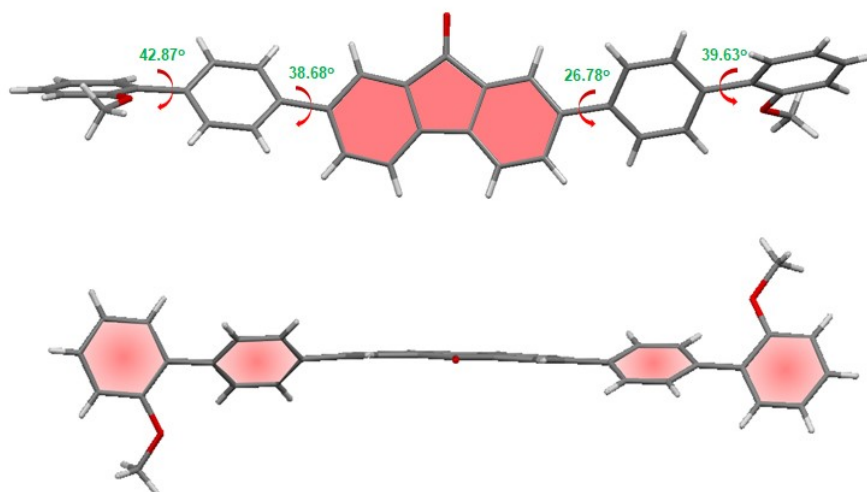

**Fig. S9** The single crystal structure of **R-MBPF**.



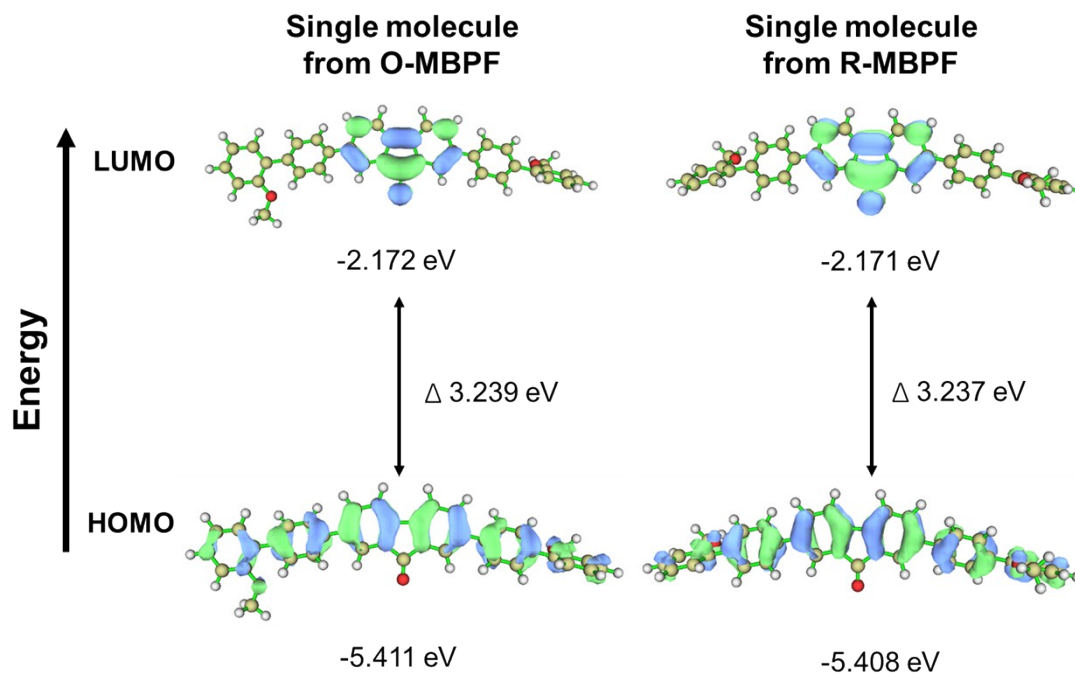

**Fig. S10** Calculated HOMO and LUMO electron cloud for orange crystal **O-MBPF** and red crystal **O-MBPF** with their relative energy according to TD-DFT calculation.

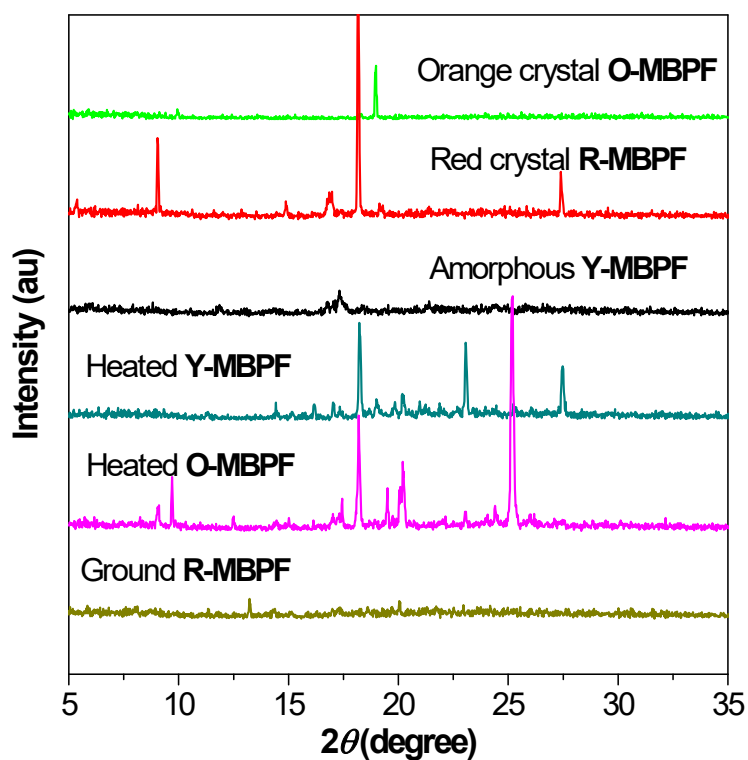

**Fig. S11** Powder XRD profiles of the Orange crystal **O-MBPF**, Red crystal **R-MBPF** and amorphous **Y-MBPF**.

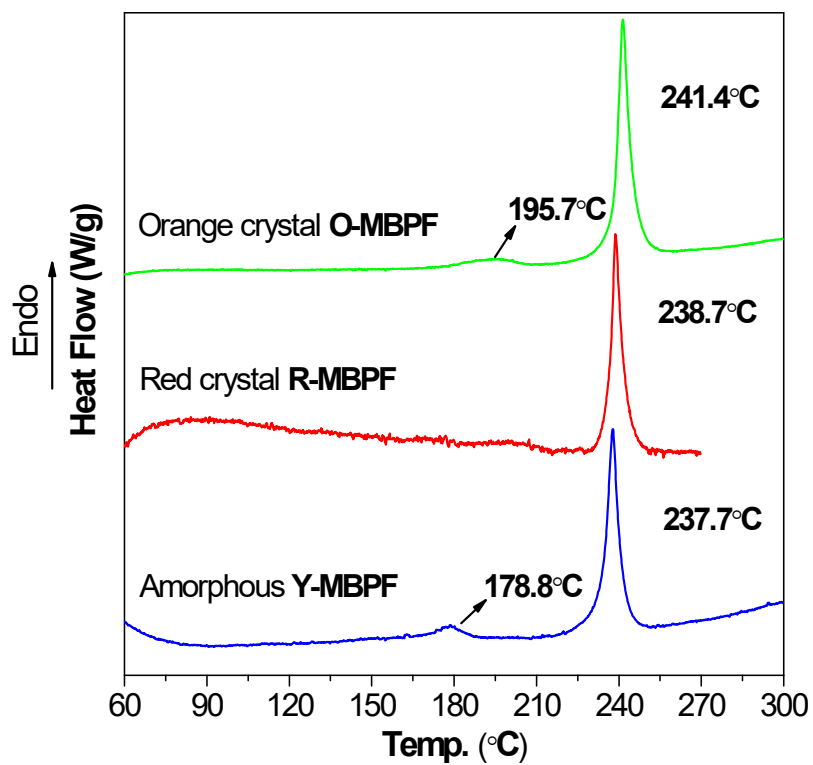

Fig. S12 DSC profiles of the orange crystal O-MBPF, red crystal R-MBPF and amorphous Y-MBPF.

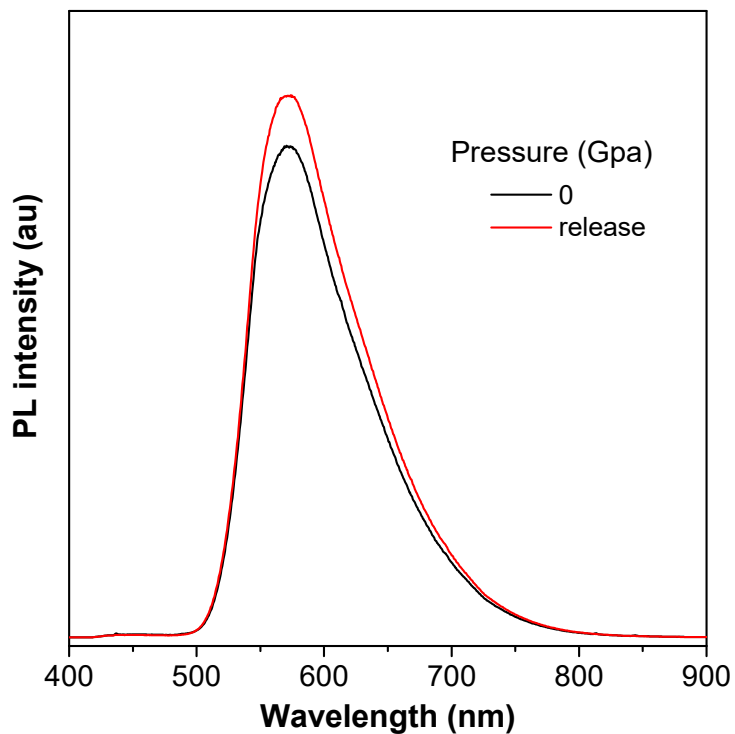

Fig. S13 The PL intensity of MBPF after release.

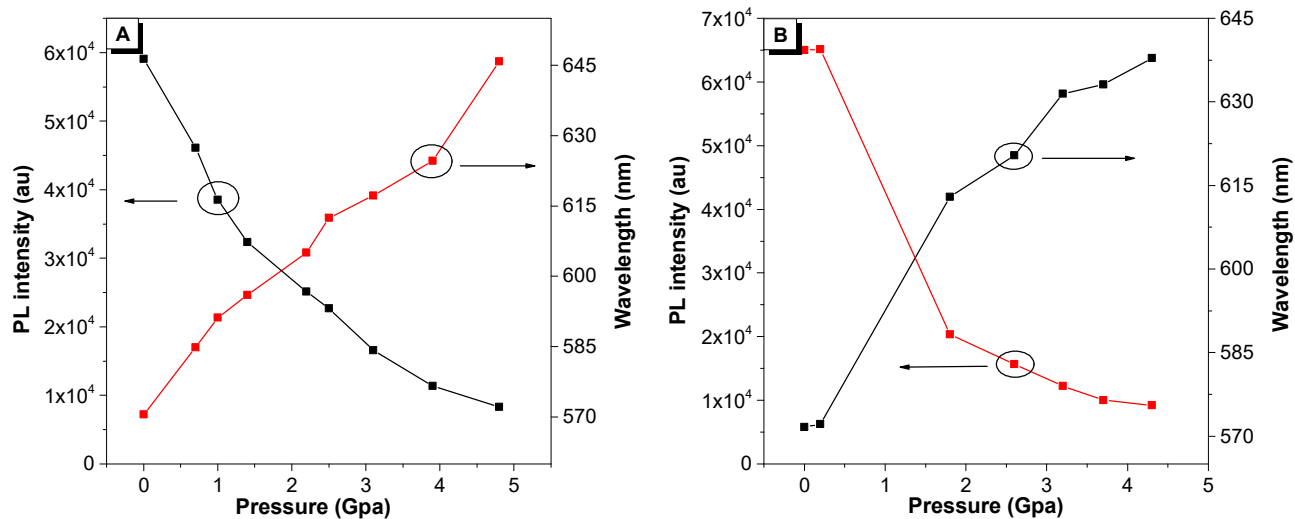

**Fig, S14** Changes of PL intensity and wavelength of R-MBPF with increasing pressure (A) and decreasing pressure (B).

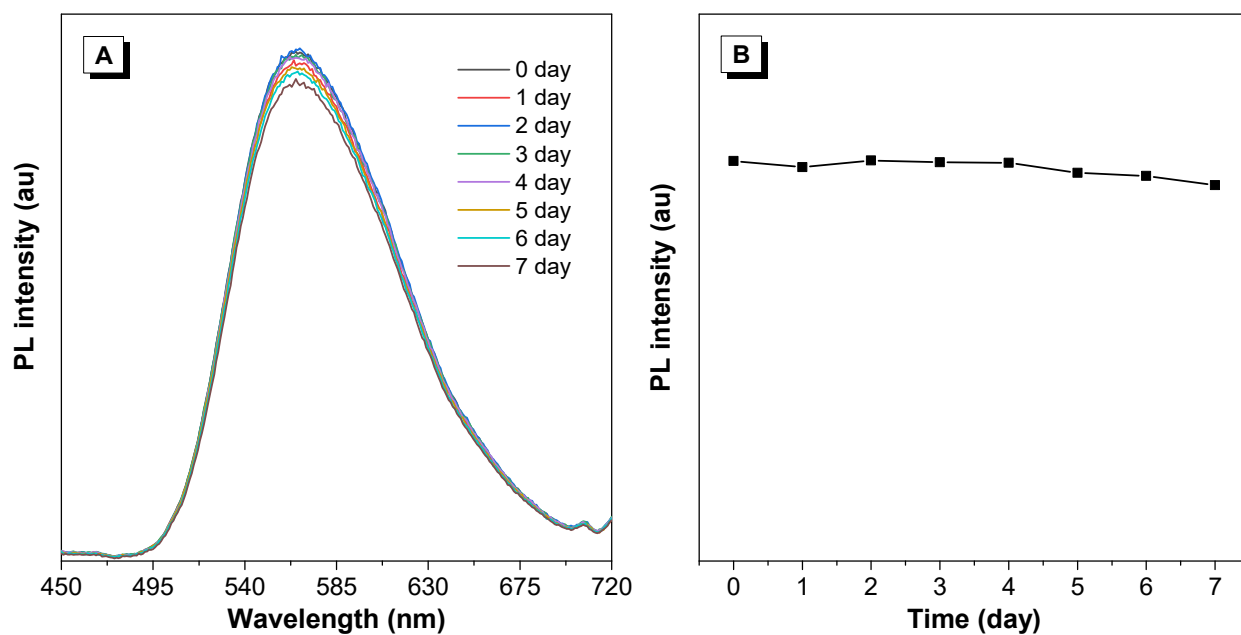

**Fig. S15** Photostability of MBPF in 90% water/THF vs. storage time.

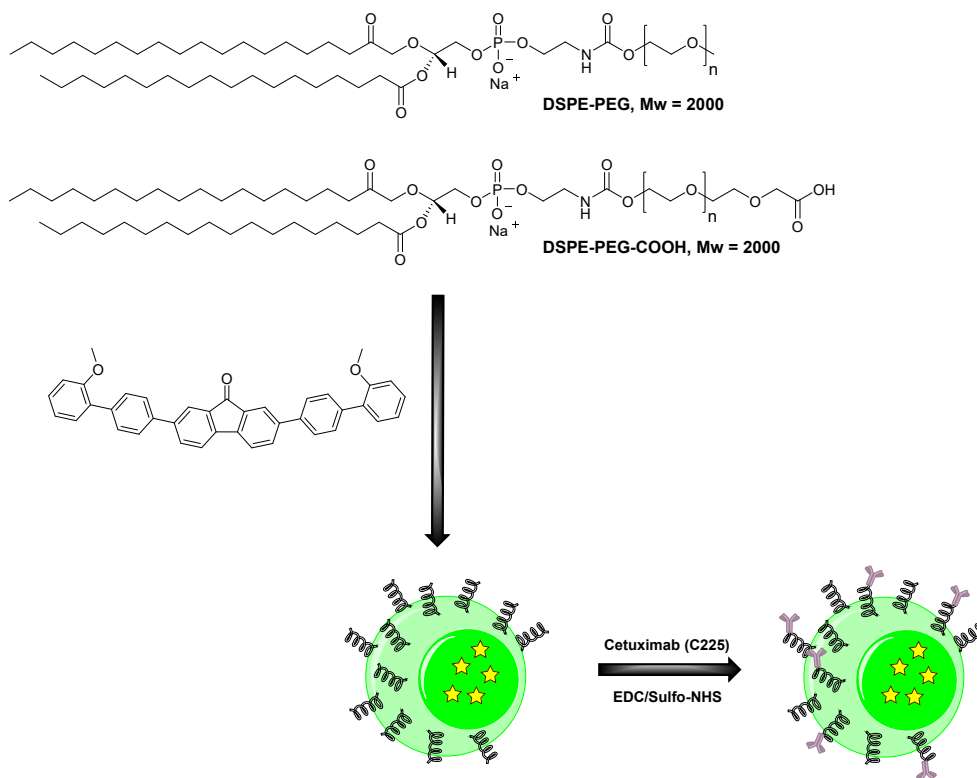

**Scheme S2.** Fabrication of MBPF-C225 NPs.

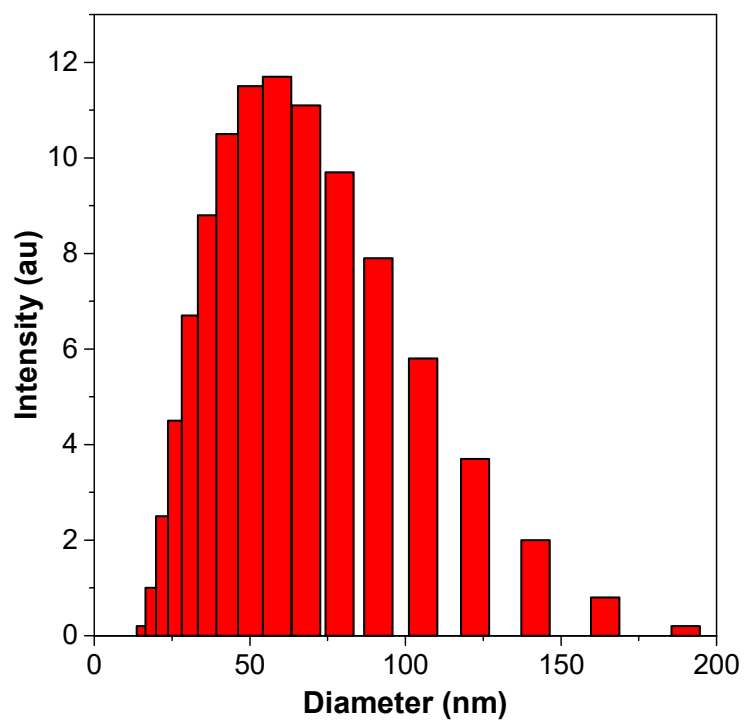

**Fig. S16** Particle size distribution of MBPF-C225 NPs studied by dynamic light scattering.

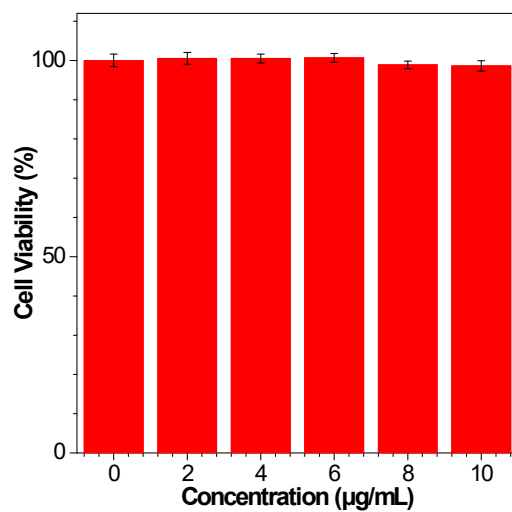

**Fig. S17** Cell viability of HCC 827 cells treated with different concentrations of **MBPF-C225** NPs.

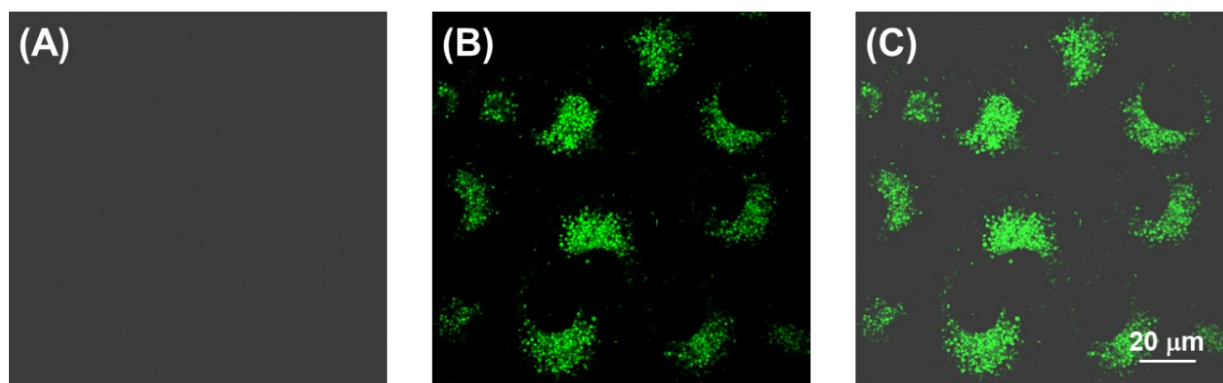

**Fig. S18** The CLSM images of HCC827 cells after incubation with **MBPF-C225** NPs at 37 °C for 6 h. (A) Bright-field images; (B) fluorescence images; (C) the merged image of (A) and (B). Scale bar = 20 µm.

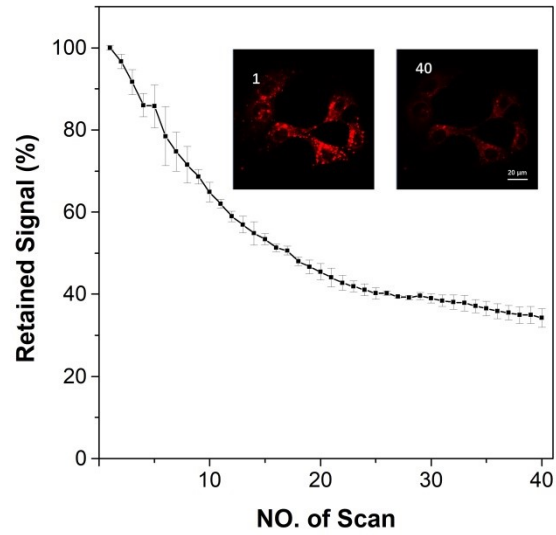

**Fig. S19** Retained signal (%) of fluorescence of HCC827 cells stained with LysoTracker red with increasing number of scans. Inset: Fluorescence images of HCC827 cells with increasing number of scans (1 and 40 scans; the number of scans shown in upper left corner).
